# Supplementary material
Source: publisher site journal article supplement (https://www.dovepress.com/article/319503)
Supplement: Supplementary file 1 [file get_supplementary_file.php]

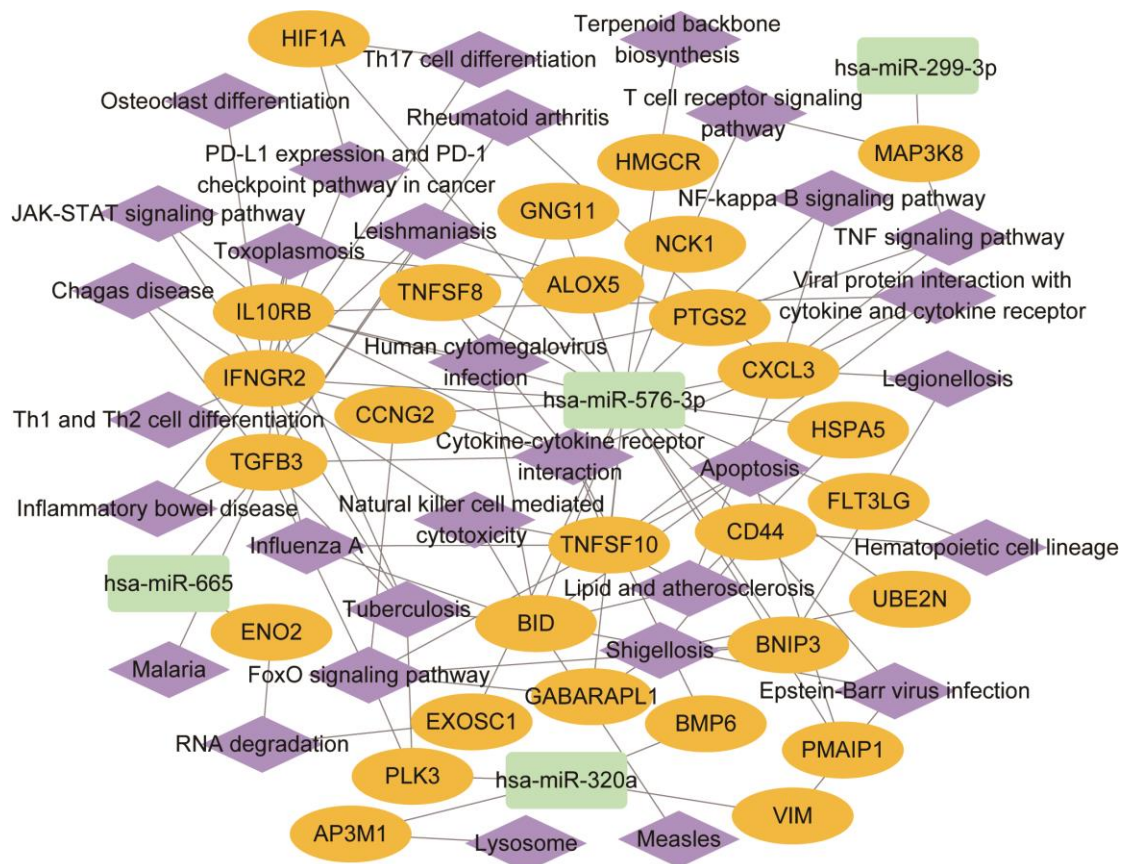

**Supplementary Figure S1.** The network of four miRNAs targeting mRNAs and enriched in KEGG pathways. Rectangles represent miRNAs; ellipses, mRNAs; and diamonds, KEGG signaling pathways.
